# Supplementary material
Source: PubMed Central journal article supplement (PMC7989001)
Supplement: 12859_2021_4076_MOESM3_ESM.pdf [file 12859_2021_4076_MOESM3_ESM.pdf]

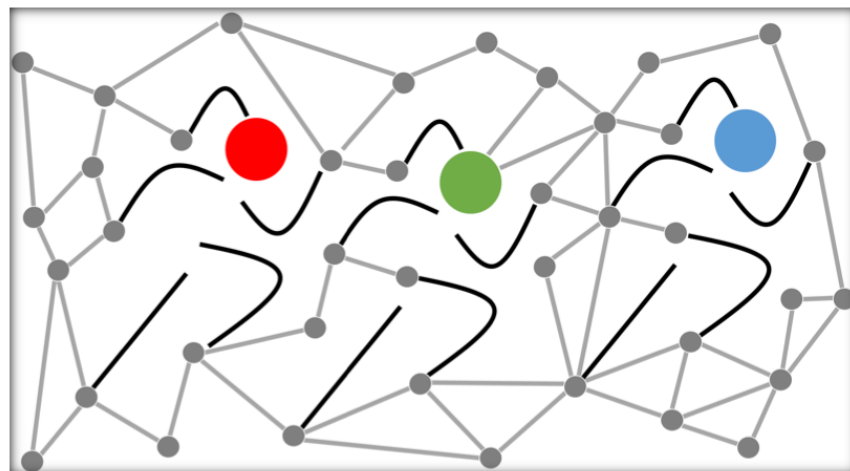

S A v e R U N N E R

Searching off-lAbel dRUg aNd NEtwork

# GETTING STARTED

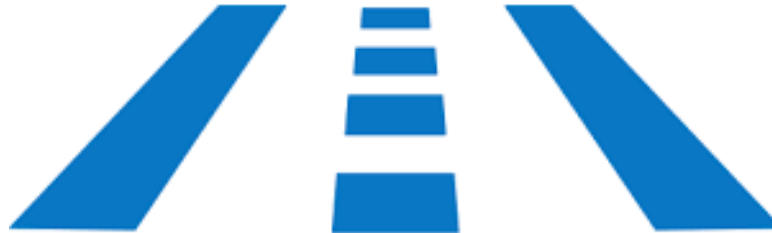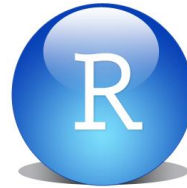

## Software requirement

- SAveRUNNER has been developed in R (version 3.6.1) and tested on the following operative systems:
  - macOS High Sierra 10.13.6
  - Windows 10 Pro

## Setting up

- Install R and R studio
- Download and unzip the SAveRUNNER software package ("*src*" folder)

-  Folder to create with mandatory name
-  SAveRUNNER package to download

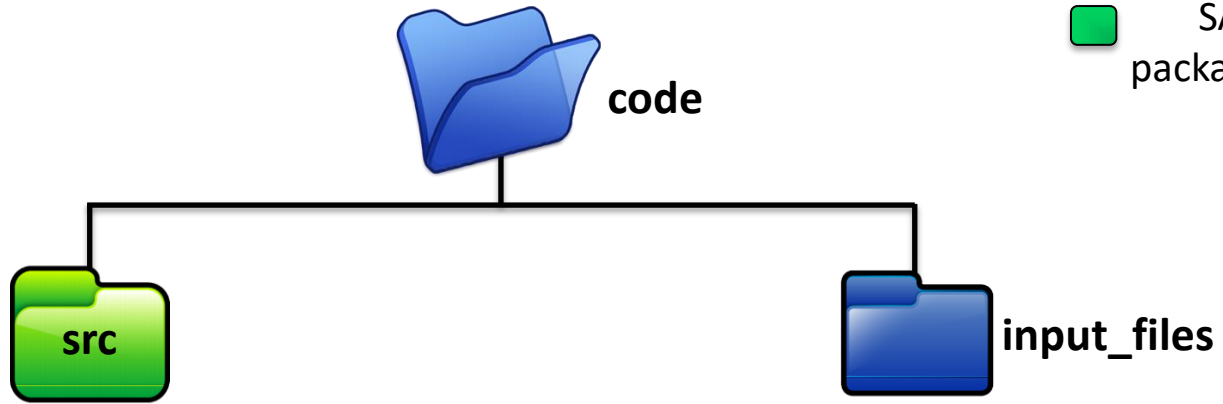

-  Folder to create with mandatory name
-  SAveRUNNER package to download

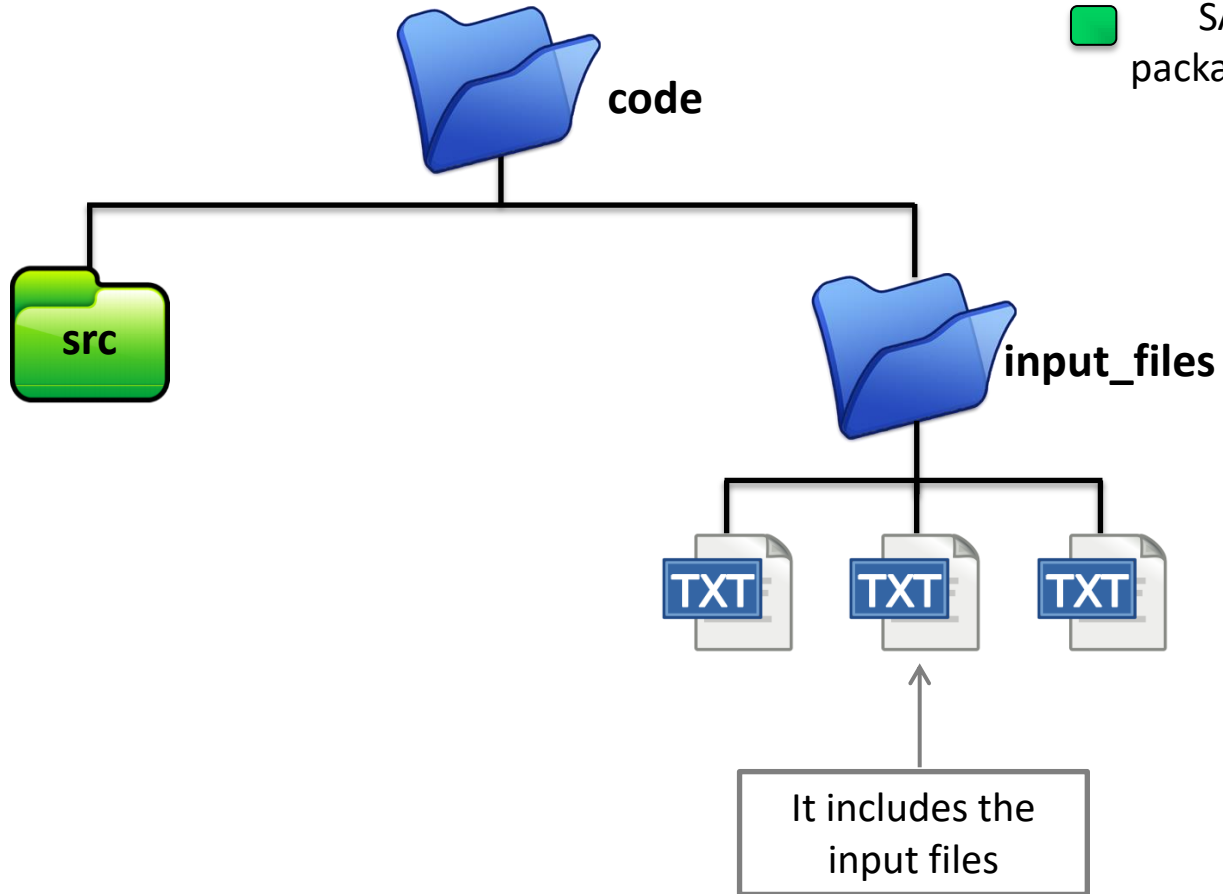

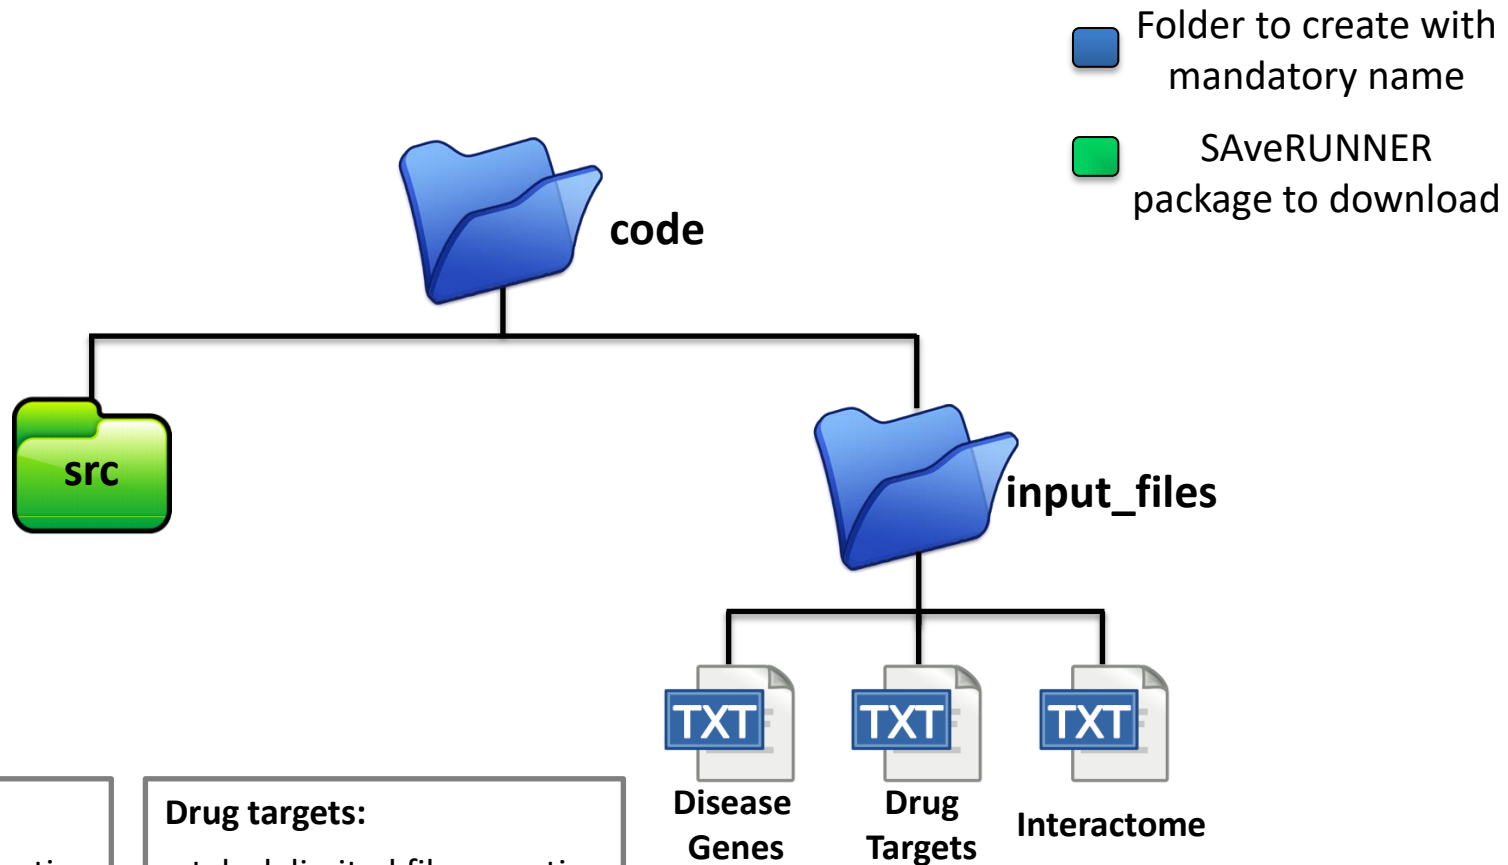

**Disease genes:**

a tab-delimited file reporting the disease-gene association as an edges list. It must include two columns: one named **“disease”** with the disease names and the other one named **“GeneID”** with the associated disease genes in Entrez Gene ID.

**Drug targets:**

a tab-delimited file reporting the drug-targets interactions as an edges list. It must include two columns: one named **“Drug”** with the drug names and the other one named **“GeneID”** with the interacting target genes in Entrez Gene ID.

**Interactome:**

a tab-delimited file reporting the human interactome. It must be provided as an edges list, i.e., it must include two columns reporting all the pairs of interacting genes in Entrez Gene ID.

## Disease Genes - example

|    | A        | B      |
|----|----------|--------|
| 1  | disease  | GeneID |
| 2  | COVID-19 | 25980  |
| 3  | COVID-19 | 10157  |
| 4  | COVID-19 | 26574  |
| 5  | COVID-19 | 4363   |
| 6  | COVID-19 | 28976  |
| 7  | COVID-19 | 34     |
| 8  | COVID-19 | 2181   |
| 9  | COVID-19 | 8754   |
| 10 | COVID-19 | 9510   |
| 11 | COVID-19 | 8540   |
| 12 | COVID-19 | 10270  |

## Drug Targets - example

|    | A              | B      |
|----|----------------|--------|
| 1  | Drug           | GeneID |
| 2  | Zuclopenthixol | 150    |
| 3  | Zuclopenthixol | 1813   |
| 4  | Zuclopenthixol | 1812   |
| 5  | Zuclopenthixol | 1816   |
| 6  | Zuclopenthixol | 3356   |
| 7  | Zuclopenthixol | 148    |
| 8  | Zuclopenthixol | 3269   |
| 9  | Zucapsaicin    | 7442   |
| 10 | Zotepine       | 1813   |
| 11 | Zotepine       | 1812   |
| 12 | Zotepine       | 1816   |
| 13 | Zotepine       | 6530   |
| 14 | Zotepine       | 3356   |
| 15 | Zotepine       | 6532   |

## Interactome - example

|    | A                | B               | C                 | D |
|----|------------------|-----------------|-------------------|---|
| 1  | Gene_A_Entrez ID | GeneB_Entrez_ID | data_source(s)    |   |
| 2  | 1                | 310             | IntAct,PINA       |   |
| 3  | 1                | 368             | IntAct,PINA       |   |
| 4  | 1                | 1026            | IntAct,PINA       |   |
| 5  | 1                | 2886            | IntAct,PINA       |   |
| 6  | 1                | 3958            | InnateDB          |   |
| 7  | 1                | 4899            | PINA              |   |
| 8  | 1                | 6606            | IntAct,PINA       |   |
| 9  | 1                | 6622            | IntAct,PINA       |   |
| 10 | 1                | 7083            | IntAct,PINA       |   |
| 11 | 1                | 10321           | HPRD,PINA         |   |
| 12 | 1                | 10549           | IntAct,PINA       |   |
| 13 | 1                | 80854           | IntAct,PINA       |   |
| 14 | 2                | 60              | IntAct,PINA       |   |
| 15 | 2                | 250             | IntAct            |   |
| 16 | 2                | 259             | BioGRID,HPRD,PINA |   |
| 17 | 2                | 292             | IntAct            |   |
| 18 | 2                | 293             | IntAct            |   |
| 19 | 2                | 309             | HPRD              |   |
| 20 | 2                | 310             | IntAct,PINA       |   |

↑ source    ↑ target    ↑ Db [optional]

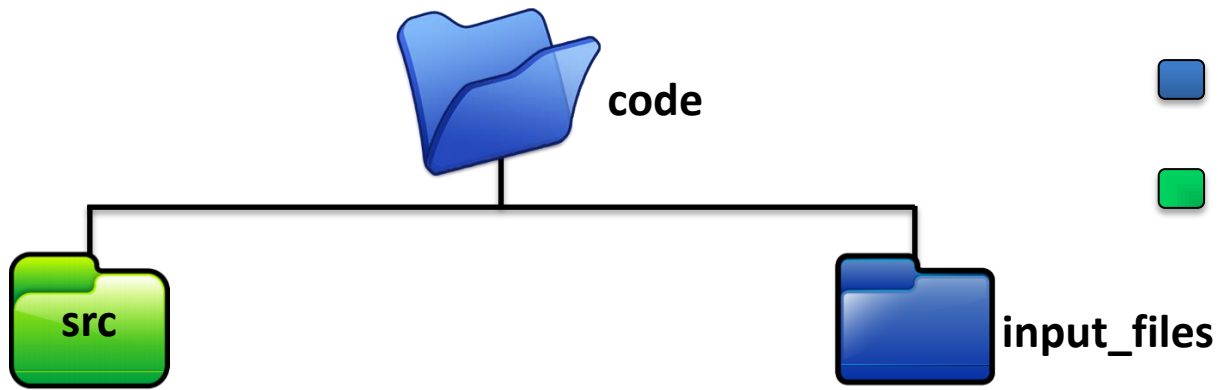

-  Folder to create with mandatory name
-  SAveRUNNER package to download

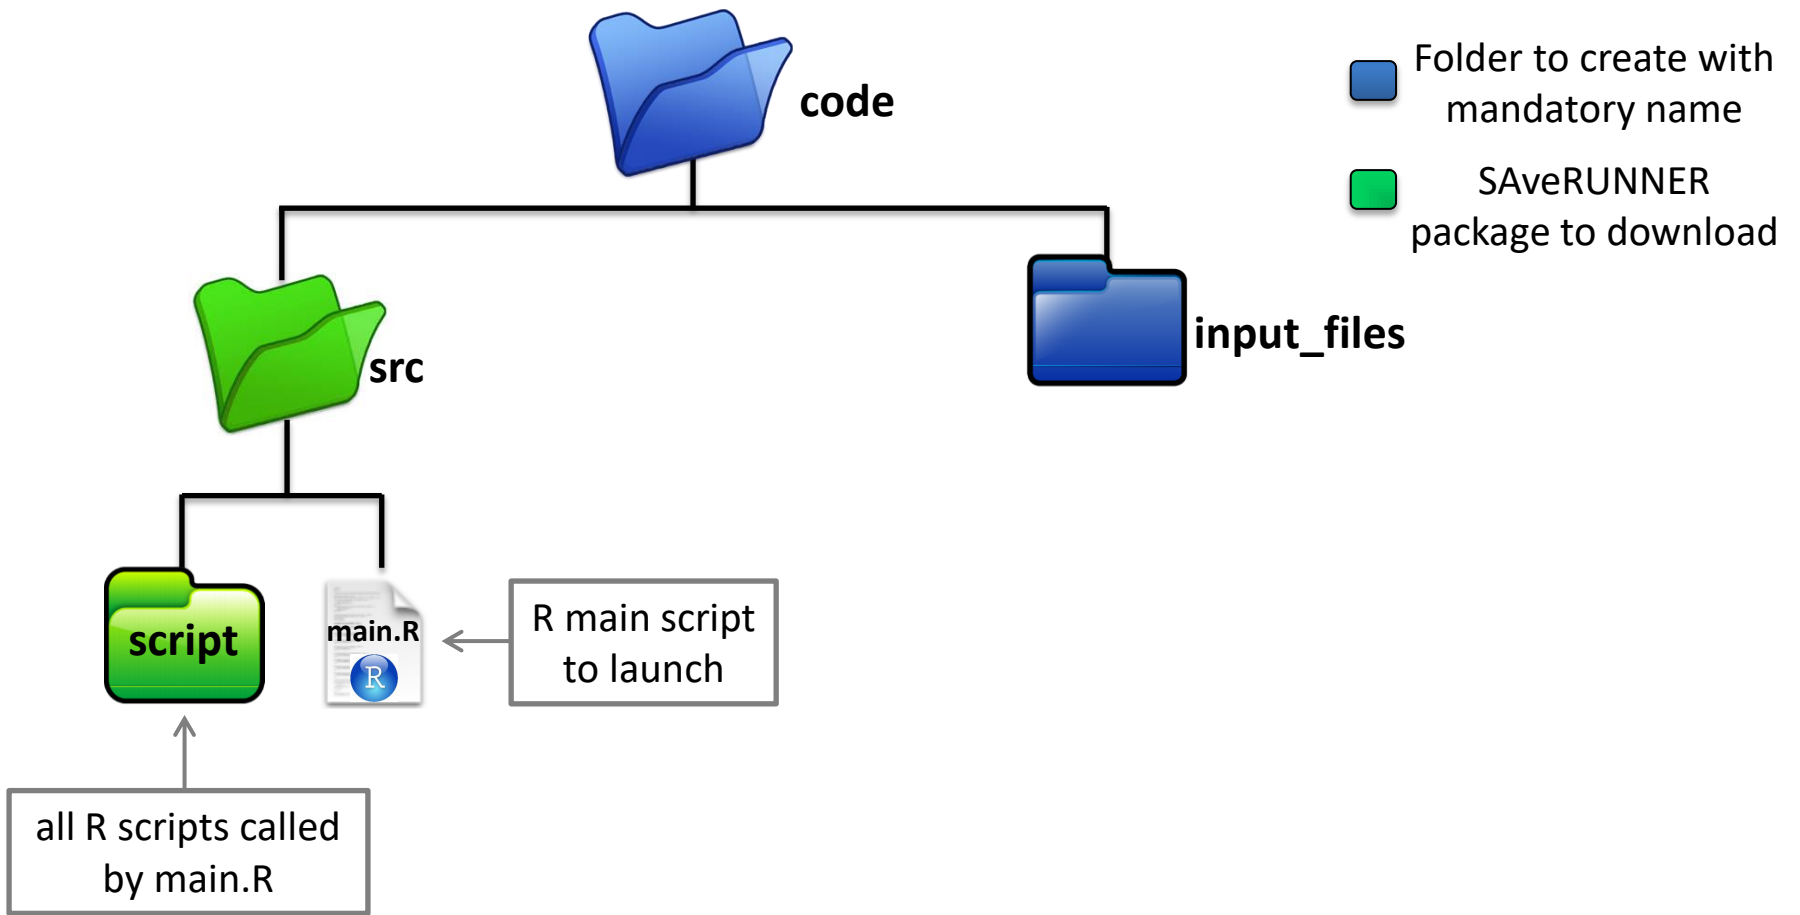



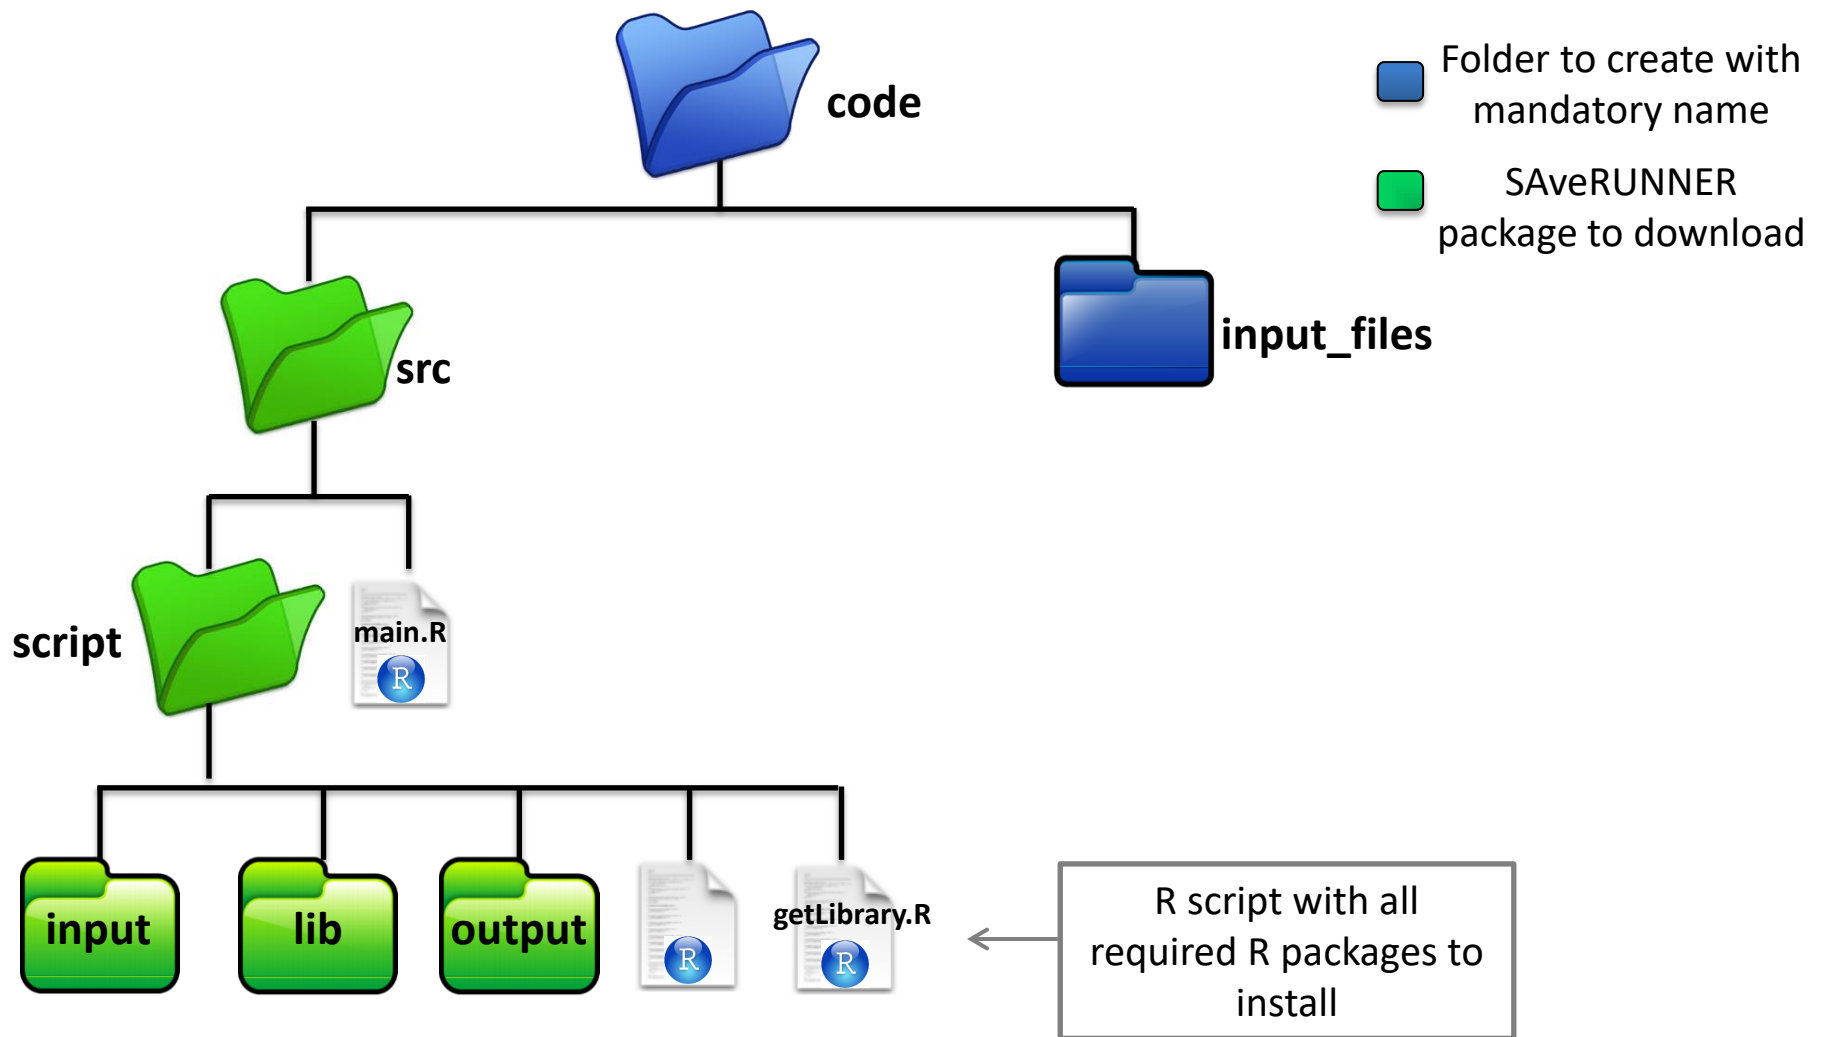

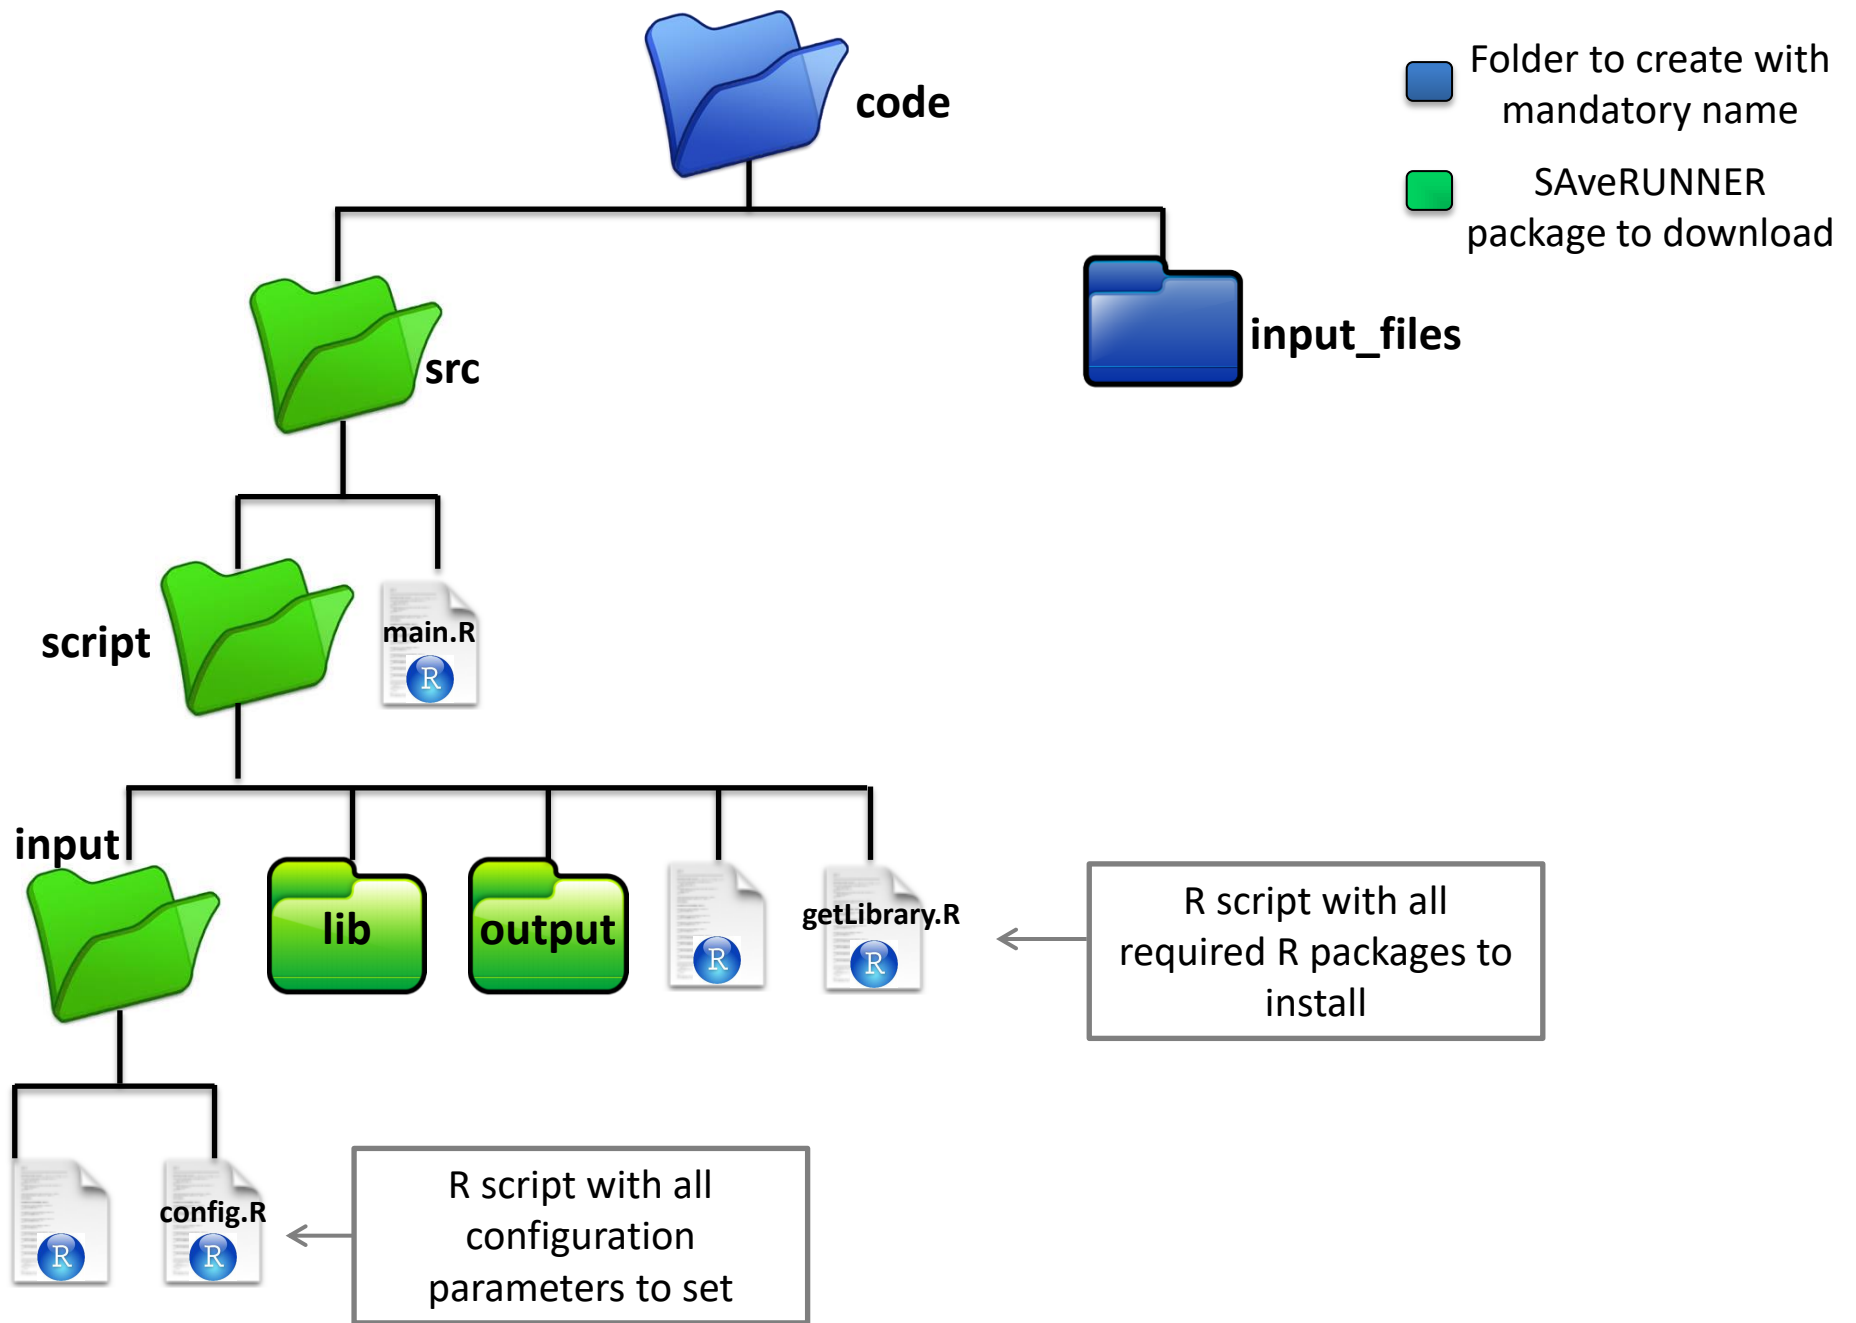



-  Folder to create with mandatory name
-  SAveRUNNER package to download

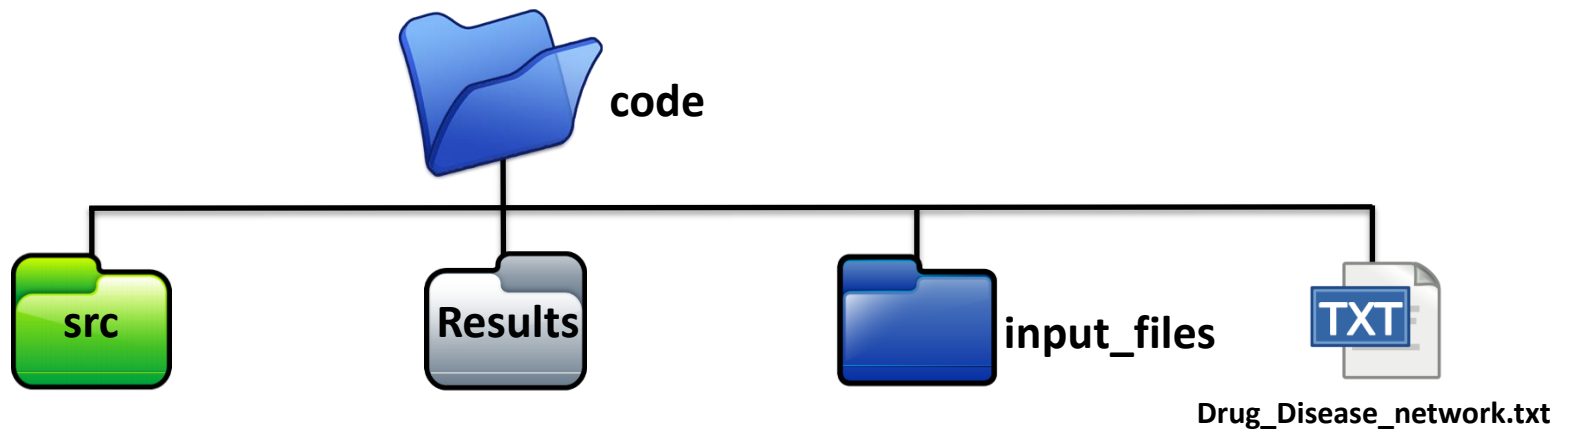

**Drug\_Disease\_network:**  
a tab-delimited file created as output by SAveRUNNER reporting **all** the drug-disease associations with the **proximity** measure and corresponding **p-values**

-  Folder to create with mandatory name
-  SAveRUNNER package to download
-  Output folder

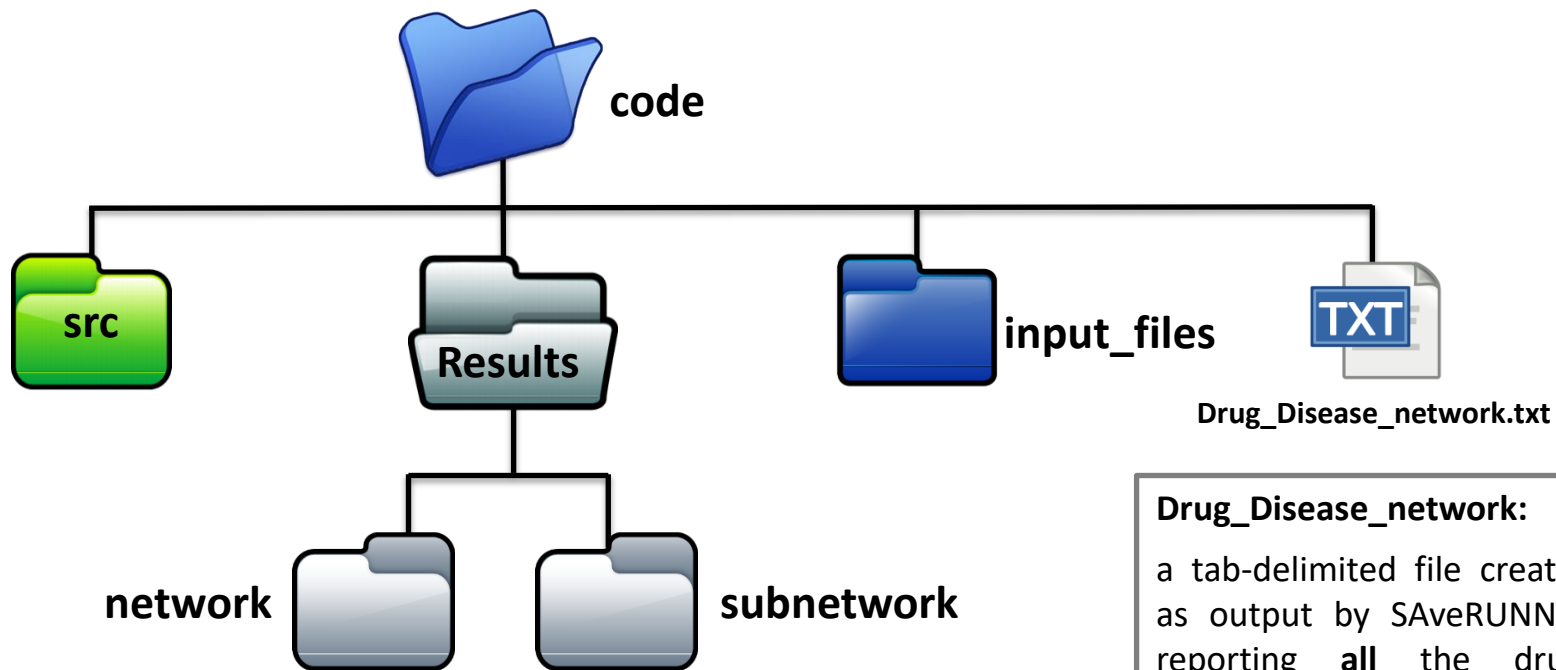

**Drug\_Disease\_network:**  
a tab-delimited file created as output by SAveRUNNER reporting **all** the drug-disease associations with the **proximity** measure and corresponding **p-values**

-  Folder to create with mandatory name
-  SAveRUNNER package to download
-  Output folder

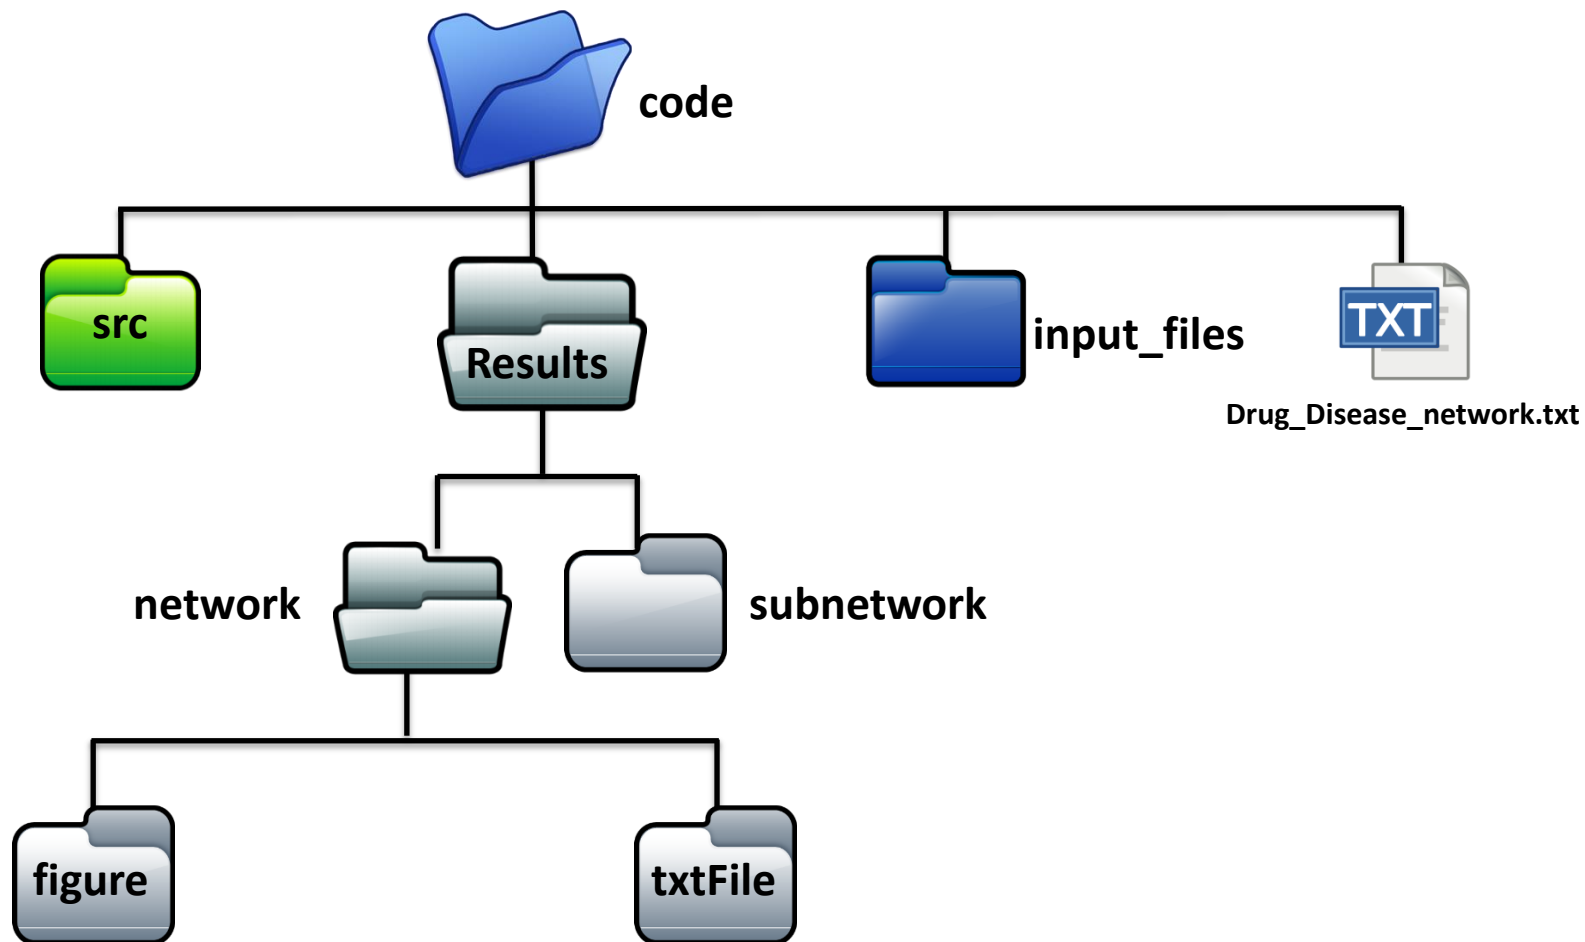

-  Folder to create with mandatory name
-  SAveRUNNER package to download
-  Output folder

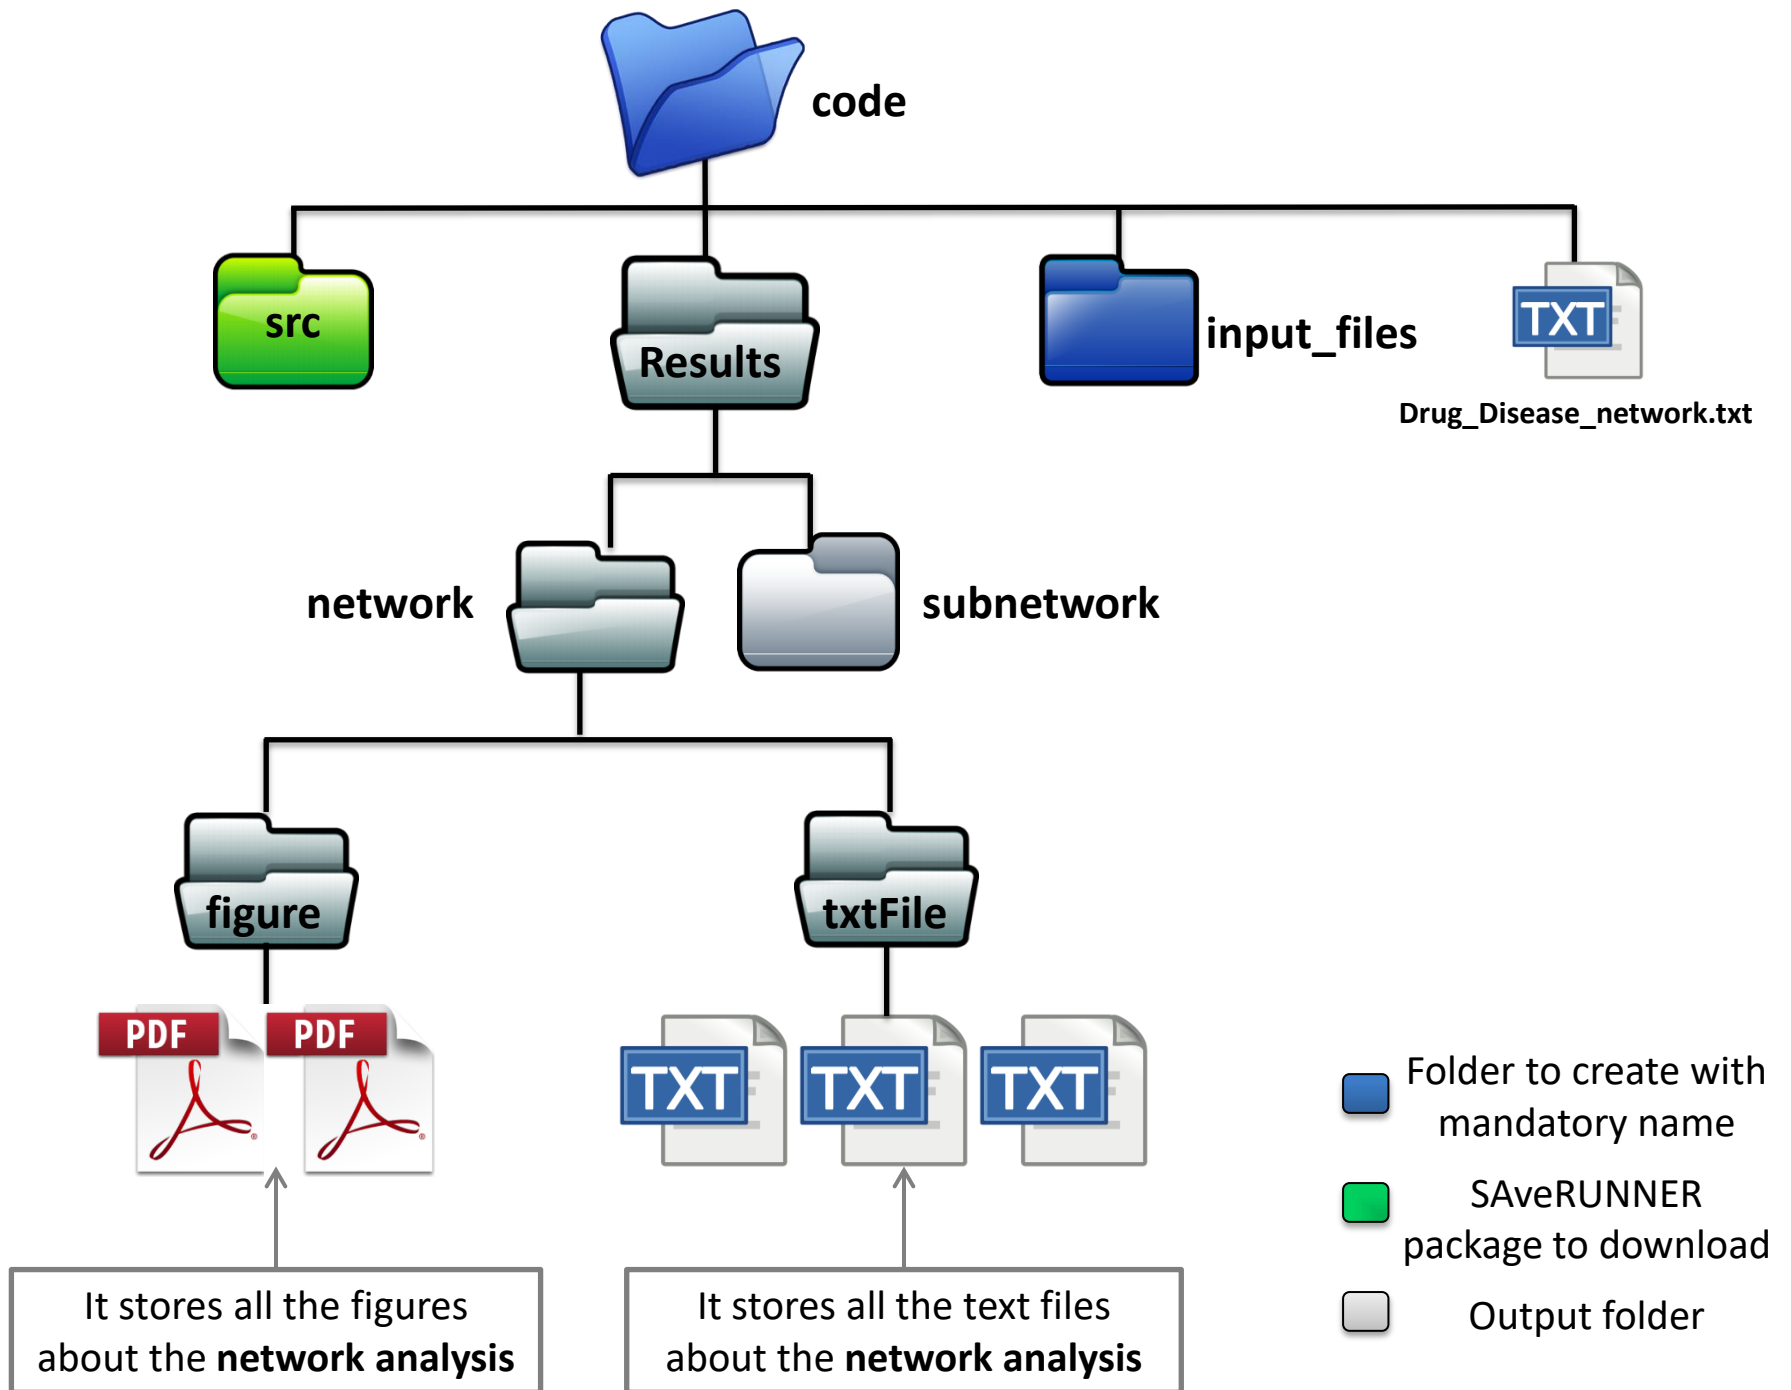

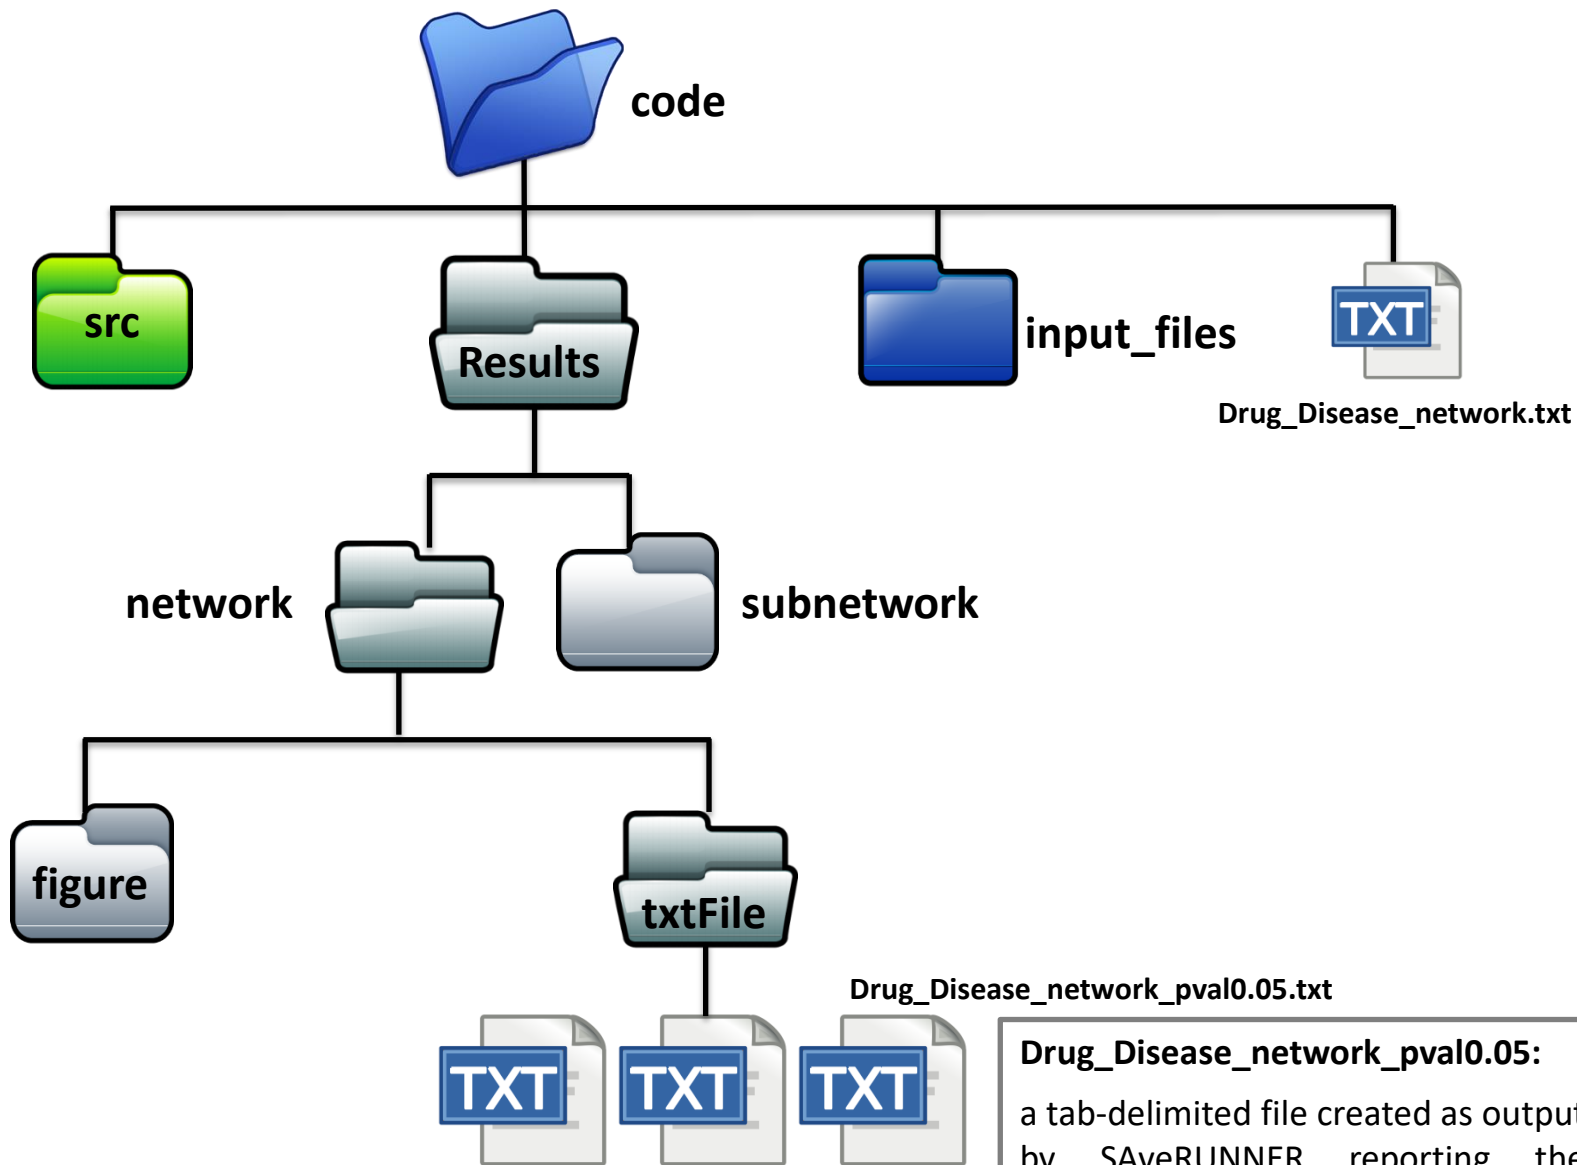

**Drug\_Disease\_network\_pval0.05:**  
a tab-delimited file created as output by SAveRUNNER reporting the statistically significant drug-disease associations



Ready to launch!

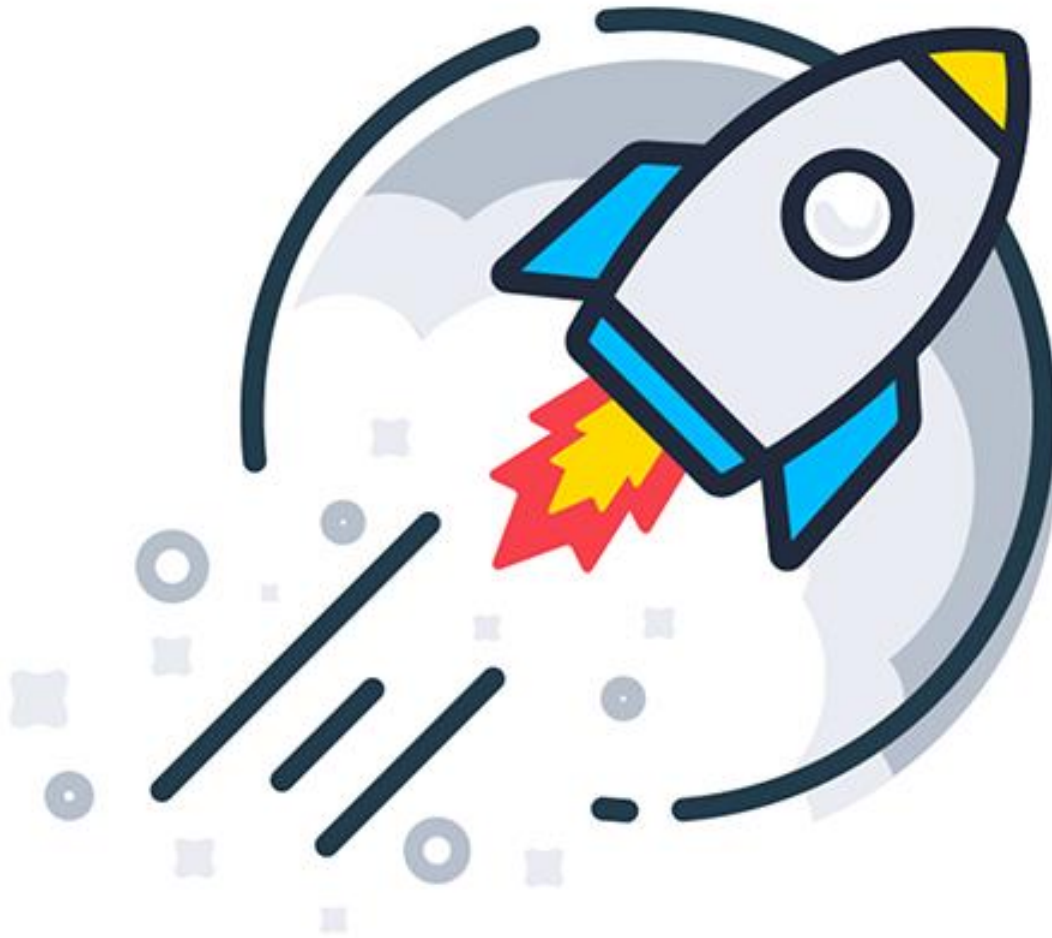

# Main file

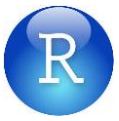

## Initial settings

```
main.R x
Source on Save
Run
Source
1 rm(list=ls())
2
3 options(stringsAsFactors = F)
4
5 setwd("~/SaveRUNNER/Code/")
6 #####
7 source("src/script/getLibrary.R")
8 source("src/script/getSource.R")
9 #####
10 getLibrary()
11 getSource()
12 input_parameter <- config()
13 input_file <- inputFiles()
14 output_file <- networkFiles()
15 #####
16 # compute drug-disease network
17 destfile = output_file$filename_out_allPval
18 if ( !file.exists(destfile) ) mainStartNetwork()
19
20 # select significant drug-disease association and (or not) adjust them
21 mainEndNetwork()
22 #####
23 # make figure
24
25 if( length(input_parameter$diseases) > 1) mainFigure()
26 #####
27 # create disease specific subnetwork
28 if( !is.null(input_parameter$sel_disease) ) mainSubnetwork()
29 #####
30
30:1 (Untitled) R Script
```

Set the working directory

```
Console ~/Documents/Didattica/class/BioinformaticsII/lessons/6_SaveRUNNER/Code/
>
```

Environment History Connections

Global Environment

Environment is empty

Files Plots Packages Help Viewer

New Folder Delete Rename More

ie > Documents > Didattica > class > BioinformaticsII > lessons > 6\_SaveRUNNER > Code > src

| Name   | Size  | Modified               |
|--------|-------|------------------------|
| ..     |       |                        |
| main.R | 868 B | Sep 19, 2020, 11:20 AM |
| script |       |                        |

# Main file



```
main.R x
Source on Save
Run
Source
1 rm(list=ls())
2
3 options(stringsAsFactors = F)
4
5 setwd("~/SaveRUNNER/Code/")
6 #####
7 source("src/script/getLibrary.R")
8 source("src/script/getSource.R")
9 #####
10 getLibrary()
11 getSource()
12 input_parameter <- config()
13 input_file <- inputFiles()
14 output_file <- networkFiles()
15 #####
16 # compute drug-disease network
17 destfile = output_file$filename_out_allPval
18 if ( !file.exists(destfile) ) mainStartNetwork()
19 #####
20 # select significant drug-disease association and (or not) adjust them
21 mainEndNetwork()
22 #####
23 # make figure
24
25 if( length(input_parameter$diseases) > 1) mainFigure()
26 #####
27 # create disease specific subnetwork
28 if( !is.null(input_parameter$sel_disease) ) mainSubnetwork()
29 #####
30
30:1 (Untitled) R Script
```

Input files

Drug-disease network

Adjusted similarity drug-disease network

Figures

Subnetwork

Environment History Connections

Import Dataset

Global Environment

Environment is empty

Help Viewer

aveRUNNER > Code > src

|        | Modified                     |
|--------|------------------------------|
| main.R | 868 B Sep 19, 2020, 11:20 AM |
| script |                              |

# Main file



## Initial settings

```
main.R x
Source on Save
Run
Source

1 rm(list=ls())
2
3 options(stringsAsFactors = F)
4
5 setwd("~/SaveRUNNER/Code/")
6 #####
7 source("src/script/getLibrary.R")
8 source("src/script/getSource.R")
9 #####
10 getLibrary()
11 getSource()
12 input_parameter <- config()
13 input_file <- inputFiles()
14 output_file <- networkFiles()
15 #####
16 # compute drug-disease network
17 destfile = output_file$filename_out_allPval
18 if ( !file.exists(destfile) ) mainStartNetwork()
19
20 # select significant drug-disease association and (or not) adjust them
21 mainEndNetwork()
22 #####
23 # make figure
24
25 if( length(input_parameter$diseases) > 1) mainFigure()
26 #####
27 # create disease specific subnetwork
28 if( !is.null(input_parameter$sel_disease) ) mainSubnetwork()
29 #####
30
30:1 (Untitled) R Script
```

Console ~/Documents/Didattica/class/BioinformaticsII/lessons/6\_SaveRUNNER/Code/

Environment History Connections

Global Environment

Environment is empty

Files Plots Packages Help Viewer

New Folder Delete Rename More

Documents > Didattica > class > BioinformaticsII > lessons > 6\_SaveRUNNER > Code > src

| Name   | Size  | Modified               |
|--------|-------|------------------------|
| ..     |       |                        |
| main.R | 868 B | Sep 19, 2020, 11:20 AM |
| script |       |                        |

# Main file



## Initial settings

```
main.R x
Source on Save
Run
Source
1 rm(list=ls())
2
3 options(stringsAsFactors = F)
4
5 setwd("~/SaveRUNNER/Code/")
6 #####
7 source("src/script/getLibrary.R")
8 source("src/script/getSource.R")
9 #####
10 getLibrary()
11 getSource()
12 input_parameter <- config()
13 input_file <- inputFiles()
14 output_file <- networkFiles()
15 #####
16 # compute drug-disease network
17 destfile = output_file$filename_out_allPval
18 if ( !file.exists(destfile) ) mainStartNetwork()
19
20 # select significant drug-disease association and (or not) adjust them
21 mainEndNetwork()
22 #####
23 # make figure
24
25 if( length(input_parameter$diseases) > 1) mainFigure()
26 #####
27 # create disease specific subnetwork
28 if( !is.null(input_parameter$sel_disease) ) mainSubnetwork()
29 #####
30
30:1 (Untitled) R Script
```

Console ~/Documents/Didattica/class/BioinformaticsII/lessons/6\_SaveRUNNER/Code/

```
> |
```

Environment History Connections

Global Environment

Environment is empty

Files Plots Packages Help Viewer

New Folder Delete Rename More

Documents > Didattica > class > BioinformaticsII > lessons > 6\_SaveRUNNER > Code > src > script

| Name         | Size   | Modified               |
|--------------|--------|------------------------|
| ..           |        |                        |
| getLibrary.R | 193 B  | Apr 19, 2020, 11:12 AM |
| getSource.R  | 2.5 KB | Sep 19, 2020, 12:31 AM |
| input        |        |                        |
| lib          |        |                        |
| output       |        |                        |

# Main file



## Initial settings

```
main.R x
Source on Save
Run
Source

1 rm(list=ls())
2
3 options(stringsAsFactors = F)
4
5 setwd("~/SaveRUNNER/Code/")
6 #####
7 source("src/script/getLibrary.R")
8 source("src/script/getSource.R")
9 #####
10 getLibrary()
11 getSource()
12 input_parameter <- config()
13 input_file <- inputFiles()
14 output_file <- networkFiles()
15 #####
16 # compute drug-disease network
17 destfile = output_file$filename_out_allPval
18 if ( !file.exists(destfile) ) mainStartNetwork()
19
20 # select significant drug-disease association and (or not) adjust them
21 mainEndNetwork()
22 #####
23 # make figure
24
25 if( length(input_parameter$diseases) > 1) mainFigure()
26 #####
27 # create disease specific subnetwork
28 if( !is.null(input_parameter$sel_disease) ) mainSubnetwork()
29 #####
30
30:1 (Untitled) R Script
```

```
~/Documents/Didattica/class/BioinformaticsII/lessons/6_SaveRUNNER/Code/
```

Environment History Connections

Global Environment

Environment is empty

Files Plots Packages Help Viewer

New Folder Delete Rename More

Didattica > class > BioinformaticsII > lessons > 6\_SaveRUNNER > Code > src > script > input

| Name         | Size   | Modified               |
|--------------|--------|------------------------|
| ..           |        |                        |
| config.R     | 2.1 KB | Sep 19, 2020, 11:20 AM |
| inputFiles.R | 1 KB   | Sep 18, 2020, 7:28 PM  |

# Configuration file



Initial settings

The screenshot shows the RStudio interface. The main editor displays the contents of the `config.R` file. A blue box highlights the first line of the file, `config <- function(){`, with an arrow pointing to it from the text "Short command line to launch SaveRUNNER".

```
1- config <- function(){
2
3-   # for executing SaverUNER launch:
4-   # source('~/.SaverUNNER/code/src/main.R')
5-   #####
6-   # parameters for computing start network with edge-weight =
7
8-   diseases <- "COVID-19"
9-   #####
10-  # parameters for computing end network
11
12-  dirRes <- "Results/"
13
14-  interaction = "similarity" # edge-weight = similarity or proximity
15-  pval_thr = 0.05           # select significant drug-disease association
16-  adjust_link = F          # adjust similarity or not
17-  new_link = F             # add new drug-disease association or not (without compute pval)
18-  #####
19-  # parameters for making figure
20
21-  if( (interaction == "proximity") ) distance = "proximity"
22-  if( (interaction == "similarity") & (adjust_link == F) ) distance = "similarity"
23-  if( (interaction == "similarity") & (adjust_link == T) ) distance = "adjusted_similarity"
24-  #####
25-  # parameters for computing subnetwork
26
27-  sel_drug = NULL
28-  sel_disease = NULL
29-  #####
30- }
```

The environment pane on the right shows the current environment is empty. The file explorer at the bottom shows the directory structure: `Home > SaveRUNNER > code > src > script > input`. It lists the files `config.R` (1.6 KB, Jan 27, 2021, 12:58 PM) and `inputFiles.R` (1.1 KB, Dec 21, 2020, 10:21 AM).

# Configuration file



## Initial settings

The screenshot shows the RStudio interface with a configuration file open. The file contains R code for setting up a SaverUNER launch. Three blue boxes with arrows point to specific lines of code:

- Box 1:** Points to line 8: `diseases <- "COVID-19"`. Text: "Insert names of *diseases* to be tested (e.g., COVID-19)".
- Box 2:** Points to line 12: `dirRes <- "Results/"`. Text: "Insert name of *Output* folder".
- Box 3:** Points to line 22: `if( (interaction == "similarity") & (adjust_link == F) ) distance = "similarity"`. Text: "Caveat: The disease names should be exactly the same as reported in the input files of *Disease Genes* (e.g., Phenopedia)".

The code in the editor is as follows:

```
1- config <- function(){
2-
3-   # for executing SaverUNER launch:
4-   # source('~/.SaverUNNER/code/src/main.R')
5-   #####
6-   # parameters for computing start network w
7-
8-   diseases <- "COVID-19"
9-   #####
10-  # parameters for computing end ne
11-
12-  dirRes <- "Results/"
13-
14-  interaction = "similarity" # edge
15-  pval_thr = 0.05           # sel
16-  adjust_link = F          # adjust similarity or not
17-  new_link = F             # add new drug-disease association or not (with
18-  #####
19-  # parameters for making figure
20-
21-  if( (interaction == "proximity") ) distance = "proximity"
22-  if( (interaction == "similarity") & (adjust_link == F) ) distance = "similarity"
23-  if( (interaction == "similarity") & (adjust_link == T) ) distance = "adjusted_similarity"
24-  #####
25-  # parameters for computing subnetwork
26-
27-  sel_drug = NULL
28-  sel_disease = NULL
29-  #####
}
```



# Configuration file



## Initial settings

The screenshot shows the RStudio interface with a configuration file open. The code in the editor is as follows:

```
1- config <- function(){
2
3- # for executing SaverUNER launch:
4- # source('~/.SaverUNER/code/src/main.R')
5- #####
6- # parameters for computing start network with edge-weight = proximity
7
8- diseases <- "COVID-19"
9- #####
10- # parameters for computing end network
11
12- dirRes <- "Results/"
13
14- interaction = "similarity" # edge-weight = similarity or proximity
15- pval_thr = 0.05 # select significant drug-disease associations
16- adjust_link = F # adjust similarity or not
17- new_link = F # add new drug-disease association
18- #####
19- # parameters for making figure
20
21- if( (interaction == "proximity") ) distance = "proximity"
22- if( (interaction == "similarity") & (adjust_link == F) ) distance = "similarity"
23- if( (interaction == "similarity") & (adjust_link == T) ) distance = "adjusted_similarity"
24- #####
25- # parameters for computing subnetwork
26
27- sel_drug = NULL
28- sel_disease = NULL
29- #####
30- }
```

Two blue callout boxes with arrows pointing to the code provide annotations:

- The first box points to line 14 and contains the text: "Set the edge-weight (i.e., 'similarity' or 'proximity')".
- The second box points to line 15 and contains the text: "Set the threshold of p-value to select statistically significant drug-disease associations".

The RStudio interface also shows the Environment pane with 'Global Environment' and the Viewer pane showing a file list:

| File         | Size   | Modified               |
|--------------|--------|------------------------|
| inputFiles.R | 1.6 KB | Jan 27, 2021, 12:58 PM |
|              | 1.1 KB | Dec 21, 2020, 10:21 AM |

# Network-based drug disease similarity

- The **similarity measure** between drug module and disease module is defined as follows:

$$\text{similarity} = \frac{\max(p) - p}{\max(p)}$$

- where  $p$  is the network proximity measure
- It assumes values ranging in  $[0,1]$

**Null similarity** means that the corresponding disease and drug modules are **very distal** in the human interactome (i.e.,  $p$  is maximum); whereas **maximum similarity** means that the corresponding disease and drug modules are **very proximal** in the human interactome (i.e.,  $p$  equal to zero).

- The **proximity** between the lists of drug targets and disease genes is defined as:

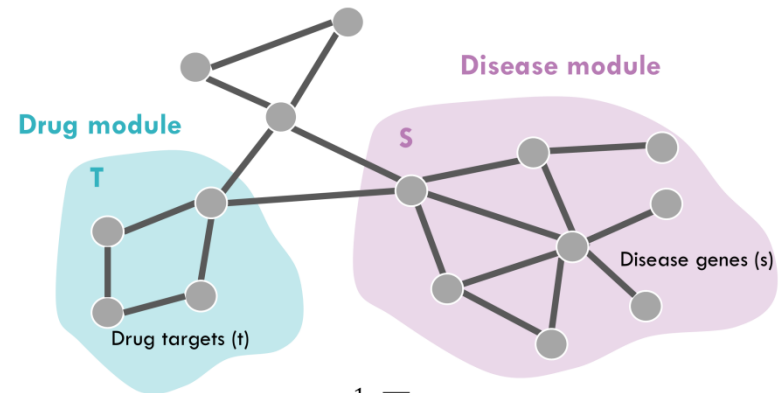

$$p(T, S) = \frac{1}{\|T\|} \sum_{t \in T} \min_{s \in S} d(t, s)$$

$T$  = set of drug targets

$S$  = set of disease genes

$p$  = average shortest path length between drug targets  $t$  in the drug module  $T$  and the nearest disease genes  $s$  in the disease module  $S$

# Output

- The **similarity measure** between drug module and disease module is defined as follows:

$$\text{similarity} = \frac{\max(p) - p}{\max(p)}$$

- where  $p$  is the network proximity measure
- It assumes values ranging in  $[0,1]$

**Null similarity** means that the corresponding disease and drug modules are **very distal** in the human interactome (i.e.,  $p$  is maximum); whereas **maximum similarity** means that the corresponding disease and drug modules are **very proximal** in the human interactome (i.e.,  $p$  equal to zero).

- Statistically significant drug-disease associations** are selected according to the significance level for the p-values (default:  $p\text{-value} \leq 0.05$ )
- It returns the **proximity and/or similarity** drug-disease network



| disease  | drug                        | proximity  | pval         | similarity |
|----------|-----------------------------|------------|--------------|------------|
| COVID-19 | acrivastine                 | 1.00000000 | 4.220080e-02 | 0.8000000  |
| COVID-19 | alcaftadine                 | 1.00000000 | 4.161242e-02 | 0.8000000  |
| COVID-19 | alimemazine                 | 1.00000000 | 4.484301e-02 | 0.8000000  |
| COVID-19 | alverine                    | 1.00000000 | 4.578700e-02 | 0.8000000  |
| COVID-19 | amifampridine               | 1.00000000 | 3.433878e-02 | 0.8000000  |
| COVID-19 | aminocaproic acid           | 0.66666667 | 3.054591e-03 | 0.8666667  |
| COVID-19 | amrinone                    | 1.00000000 | 4.953049e-03 | 0.8000000  |
| COVID-19 | antihemophilic factor human | 1.00000000 | 3.700048e-02 | 0.8000000  |
| COVID-19 | asparagine                  | 1.16666667 | 1.088828e-02 | 0.7666667  |
| COVID-19 | astemizole                  | 1.00000000 | 2.194849e-02 | 0.8000000  |
| COVID-19 | avanafil                    | 1.00000000 | 5.180000e-06 | 0.8000000  |
| COVID-19 | azacitidine                 | 0.00000000 | 6.440000e-08 | 1.0000000  |
| COVID-19 | azatadine                   | 1.00000000 | 3.414587e-02 | 0.8000000  |
| COVID-19 | bacitracin                  | 0.50000000 | 3.304639e-03 | 0.9000000  |
| COVID-19 | bepotastine                 | 1.00000000 | 1.670887e-02 | 0.8000000  |

**Drug\_Disease\_network\_pval0.05.txt**

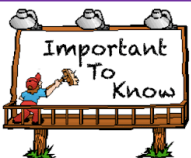

Given a disease A and a drug b, if the **p-value** associated to their distance in the human interactome is smaller of the chosen significance level (default 0.05), the probability that the off-label drug b would be effective for this disease A is greater than expected by chance
